# Supplementary material for: Synthesis, performance evaluation, and economic assessment of tailored Pt/TiO2 catalysts for selective biomass vapour upgrading via a scalable flame spray pyrolysis route
Source: Royal Society of Chemistry journal article supplement (doi:10.1039/d3cy00550j), 2023-01-01
Supplement: d3cy00550j1.pdf [file d3cy00550j1.pdf]

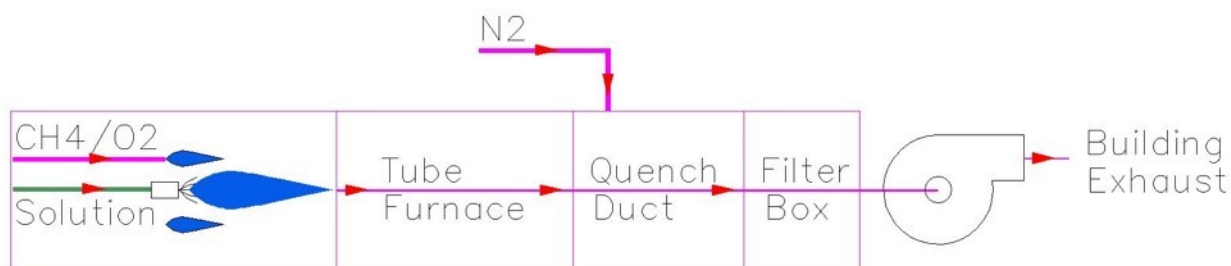

**Figure S1.** Simplified schematic of the flame spray pyrolysis apparatus.

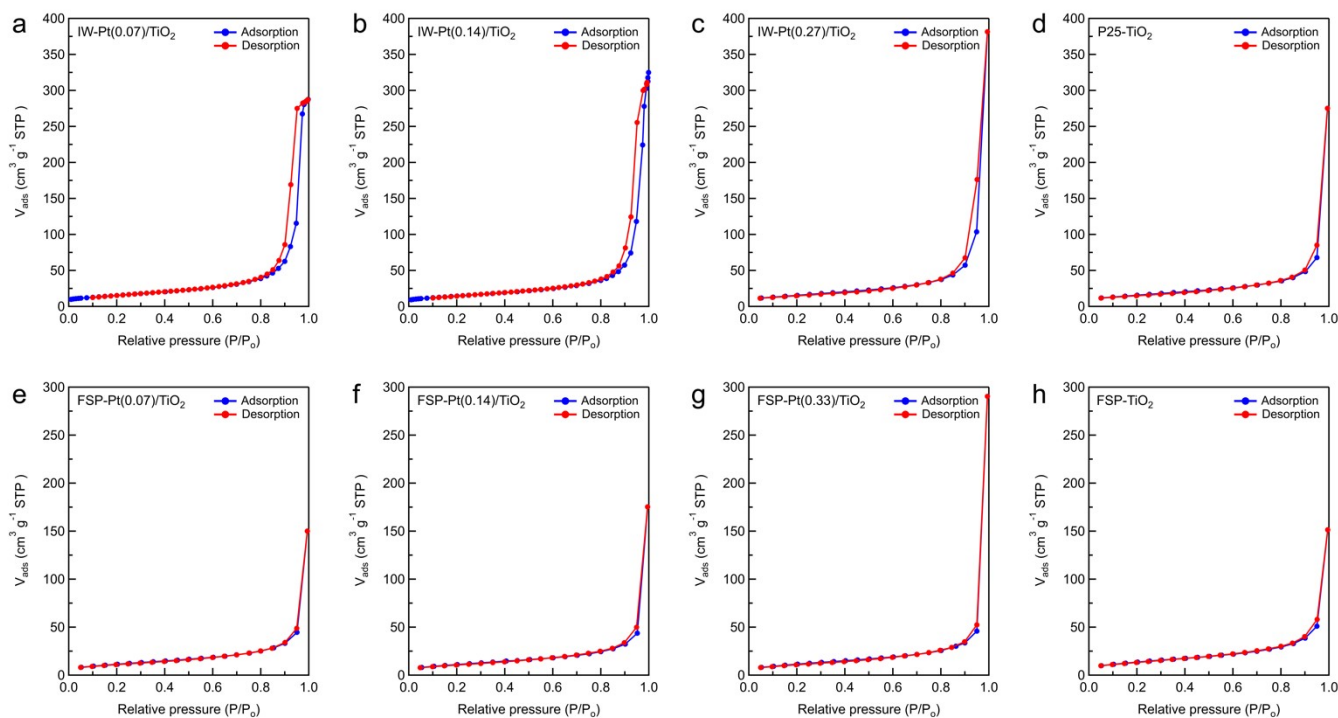

**Figure S2.** BET isotherms for Pt/TiO<sub>2</sub> catalysts prepared using flame spray pyrolysis (FSP) at (a) 0.07, (b) 0.14, (c) 0.33, and (d) 0 weight % Pt and incipient wetness (IW) at (e) 0.07, (f) 0.14, (g) 0.27, and 0 weight % Pt.

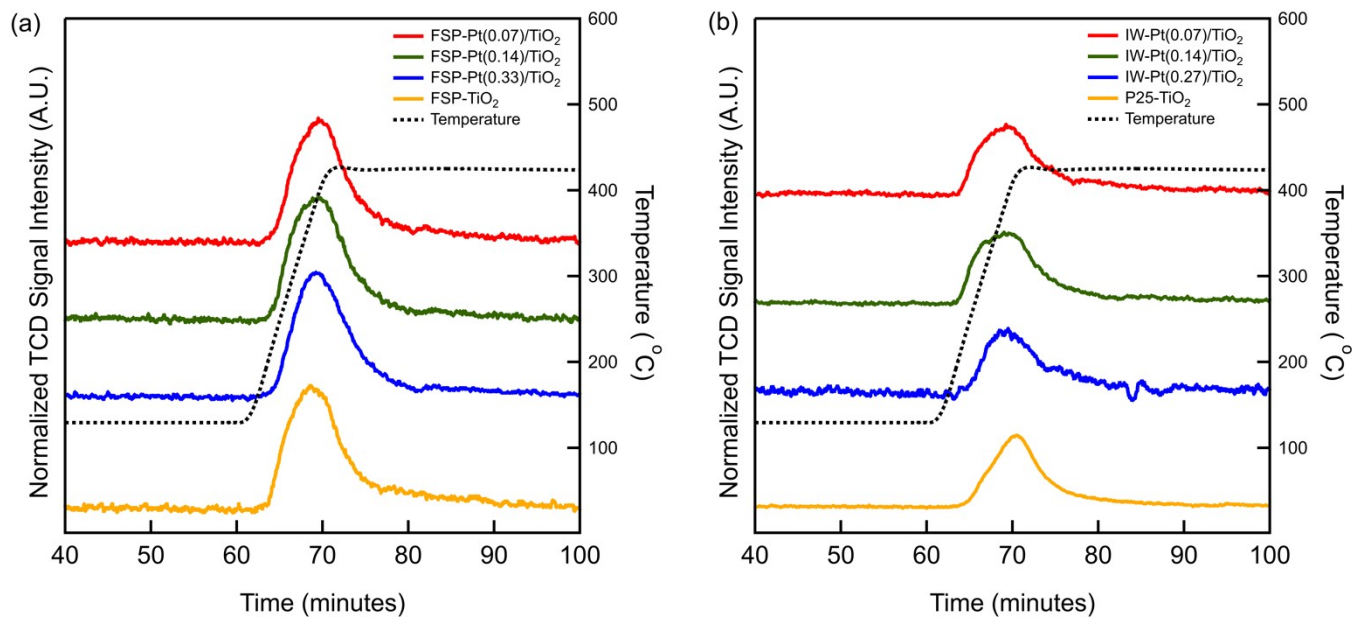

**Figure S3.**  $\text{NH}_3$ -TPD profiles for Pt/ $\text{TiO}_2$  catalysts prepared using (a) FSP and (b) IW methods

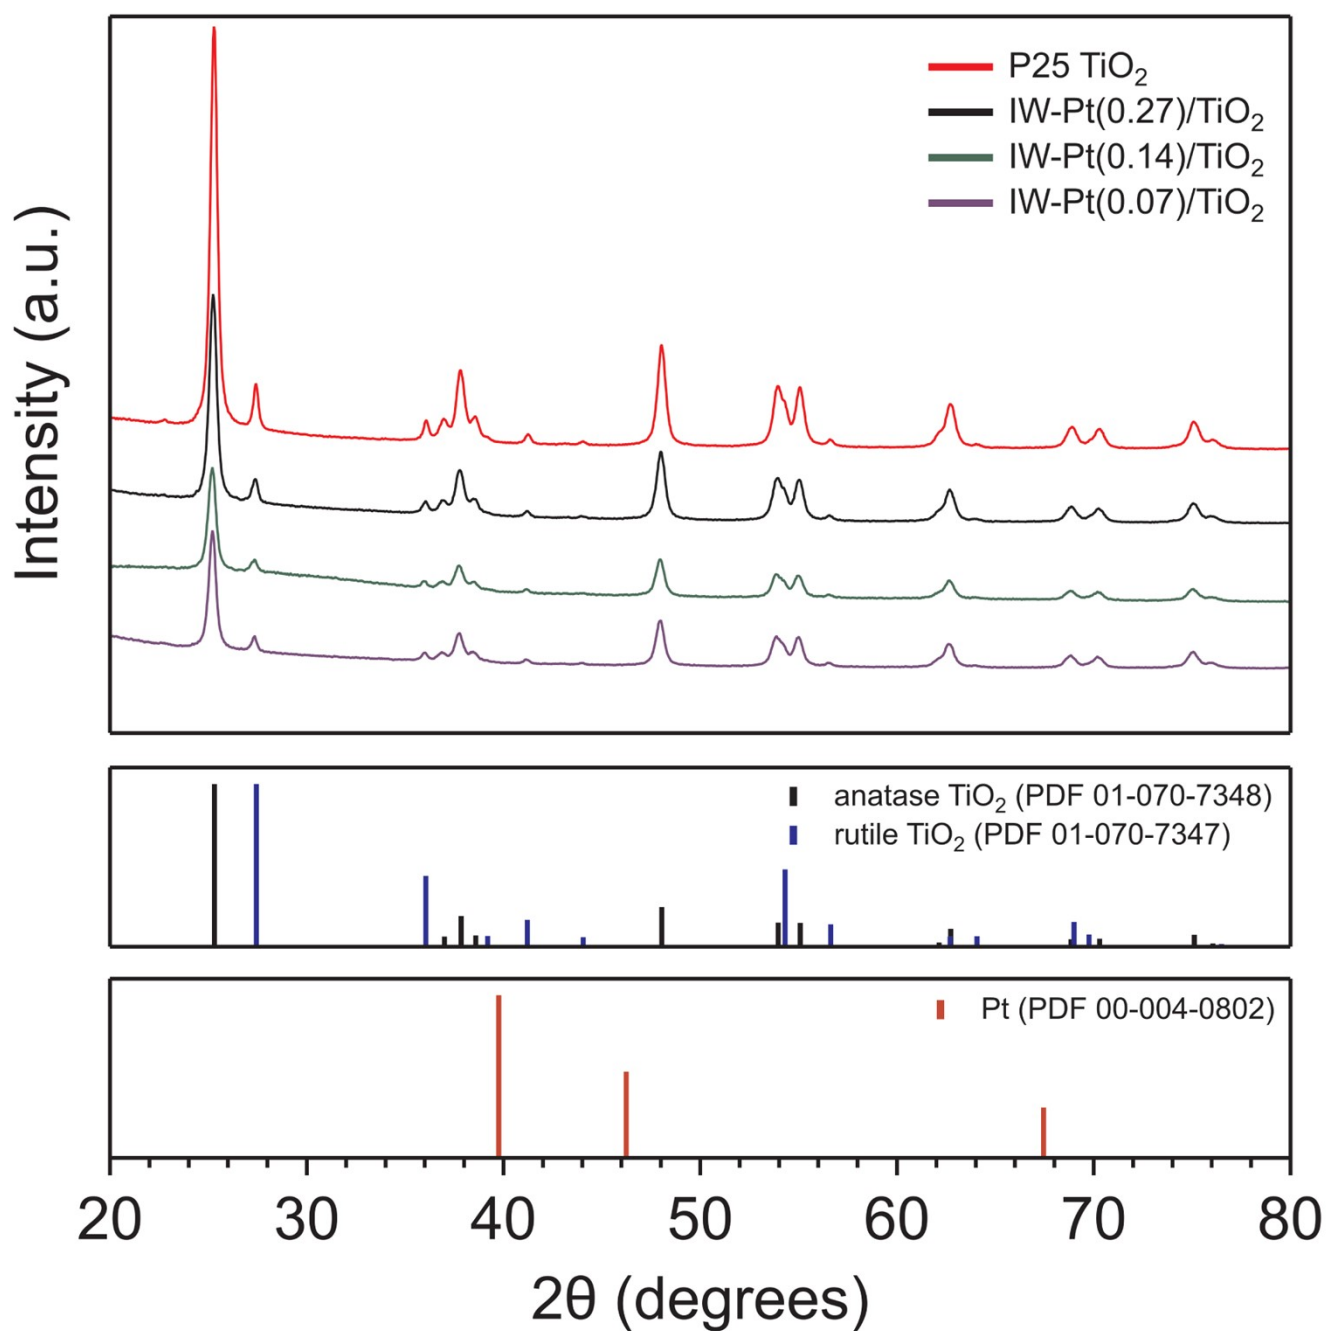

**Figure S4.** XRD patterns of IW-derived Pt/ $\text{TiO}_2$  and  $\text{TiO}_2$  with reference patterns provided below.

**Table S1.** Pore volume and pore size of Pt/TiO<sub>2</sub> catalysts and control materials as determined by N<sub>2</sub> physisorption

| Catalyst                      | Pore volume<br>(cm <sup>3</sup> · g <sup>-1</sup> ) | Average pore size<br>(nm) |
|-------------------------------|-----------------------------------------------------|---------------------------|
| FSP-TiO <sub>2</sub>          | 0.24                                                | 10                        |
| P25-TiO <sub>2</sub>          | 0.43                                                | 15                        |
| FSP-Pt(0.07)/TiO <sub>2</sub> | 0.23                                                | 11                        |
| FSP-Pt(0.14)/TiO <sub>2</sub> | 0.27                                                | 13                        |
| FSP-Pt(0.33)/TiO <sub>2</sub> | 0.45                                                | 21                        |
| IW-Pt(0.07)/TiO <sub>2</sub>  | 0.44                                                | 33                        |
| IW-Pt(0.14)/TiO <sub>2</sub>  | 0.47                                                | 36                        |
| IW-Pt(0.27)/TiO <sub>2</sub>  | 0.59                                                | 21                        |

**Table S2.** Mass % of rutile and anatase titania phases as determined by the RIR method and their respective crystallite sizes by Scherrer analysis for all FSP-Pt/TiO<sub>2</sub>, IW-Pt/TiO<sub>2</sub> catalysts and their bare FSP-TiO<sub>2</sub> and P25-TiO<sub>2</sub> analogues.

| Material                      | Anatase<br>(mass%) | Anatase Crystallite Size<br>(nm, XRD) | Rutile<br>(mass%) | Rutile Crystallite<br>Size<br>(nm, XRD) |
|-------------------------------|--------------------|---------------------------------------|-------------------|-----------------------------------------|
| FSP-TiO <sub>2</sub>          | 81.7               | 28.9(4)                               | 18.3              | 37.9(30)                                |
| P25-TiO <sub>2</sub>          | 92.5               | 19.84(1)                              | 7.5               | 29.3(5)                                 |
| FSP-Pt(0.07)/TiO <sub>2</sub> | 84.6               | 26.1(3)                               | 15.4              | 33.4(20)                                |
| FSP-Pt(0.14)/TiO <sub>2</sub> | 85.2               | 31.4(5)                               | 14.8              | 34.8(26)                                |
| FSP-Pt(0.33)/TiO <sub>2</sub> | 83.8               | 33.6(4)                               | 16.2              | 43.0(41)                                |
| IW-Pt(0.07)/TiO <sub>2</sub>  | 91.3               | 19.07(16)                             | 8.7               | 28.2(13)                                |
| IW-Pt(0.14)/TiO <sub>2</sub>  | 92.1               | 17.59(16)                             | 7.9               | 23.9(15)                                |
| IW-Pt(0.27)/TiO <sub>2</sub>  | 92.5               | 18.20(12)                             | 7.5               | 24.4(6)                                 |

**Table S3.** STEM determined average Pt particle sizes for all FSP- and IW-Pt/TiO<sub>2</sub> catalysts.

| Material                               | Pt Crystallize Size<br>(nm, S/TEM) |
|----------------------------------------|------------------------------------|
| FSP-Pt(0.07)/TiO <sub>2</sub>          | n.d.                               |
| (reduced)FSP-Pt(0.07)/TiO <sub>2</sub> | 1.1 ± 0.2                          |
| FSP-Pt(0.14)/TiO <sub>2</sub>          | 0.5 ± 0.2                          |
| (reduced)FSP-Pt(0.14)/TiO <sub>2</sub> | 1.5 ± 0.7                          |
| FSP-Pt(0.33)/TiO <sub>2</sub>          | 0.8 ± 0.2                          |
| (reduced)FSP-Pt(0.30)/TiO <sub>2</sub> | 1.3 ± 0.4                          |
| IW-Pt(0.07)/TiO <sub>2</sub>           | 0.9 ± 0.2                          |
| IW-Pt(0.14)/TiO <sub>2</sub>           | 1.1 ± 0.2                          |
| IW-Pt(0.27)/TiO <sub>2</sub>           | 1.3 ± 0.5                          |

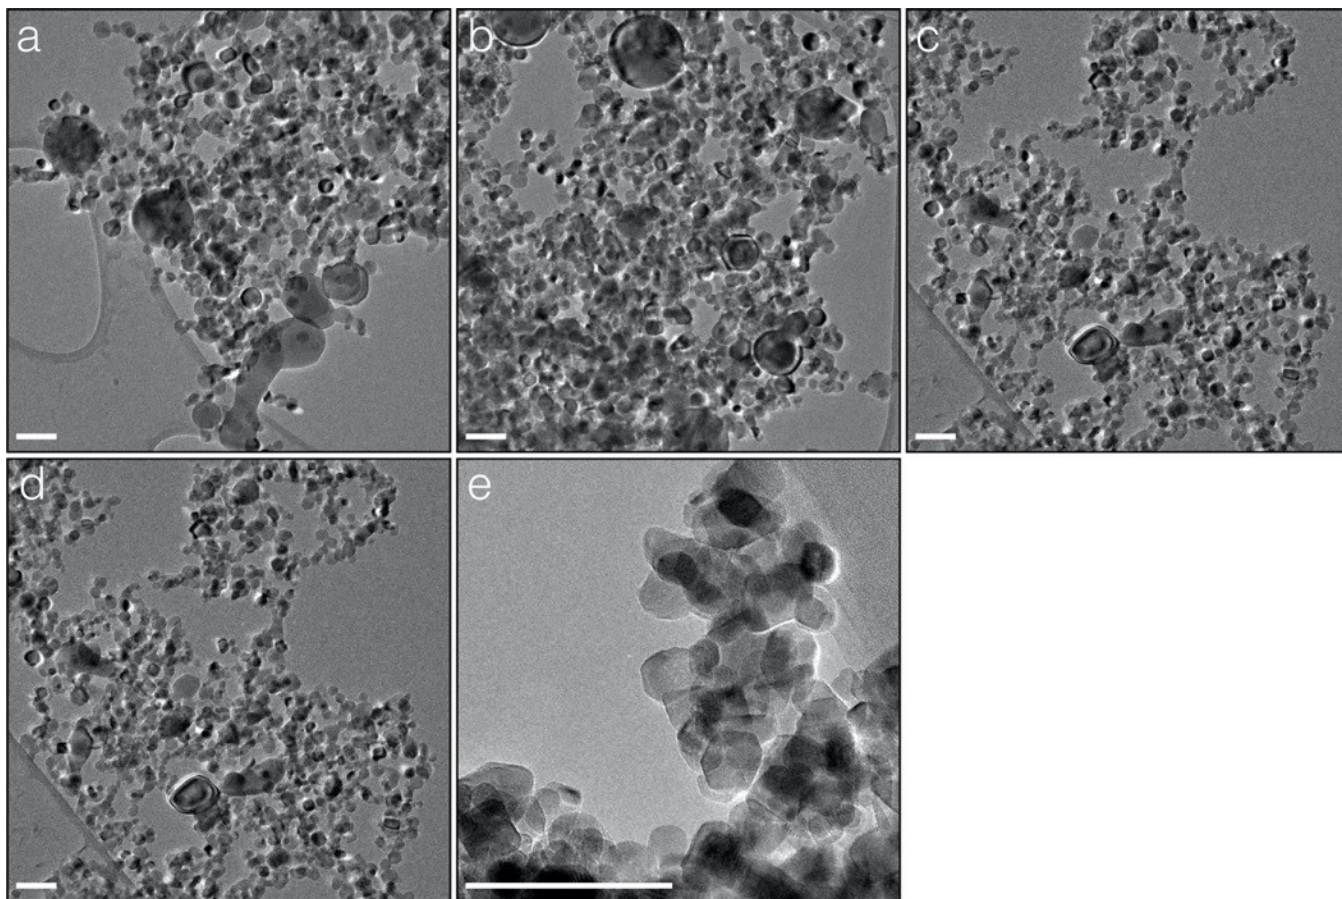

**Figure S5.** TEM images of (a) FSP-Pt(0.07)/TiO<sub>2</sub>, (b) FSP-Pt(0.14)/TiO<sub>2</sub>, (c) FSP-Pt(0.33)/TiO<sub>2</sub>, (d) FSP-TiO<sub>2</sub>, and (e) P25-TiO<sub>2</sub>. All scale bars are 100 nm.

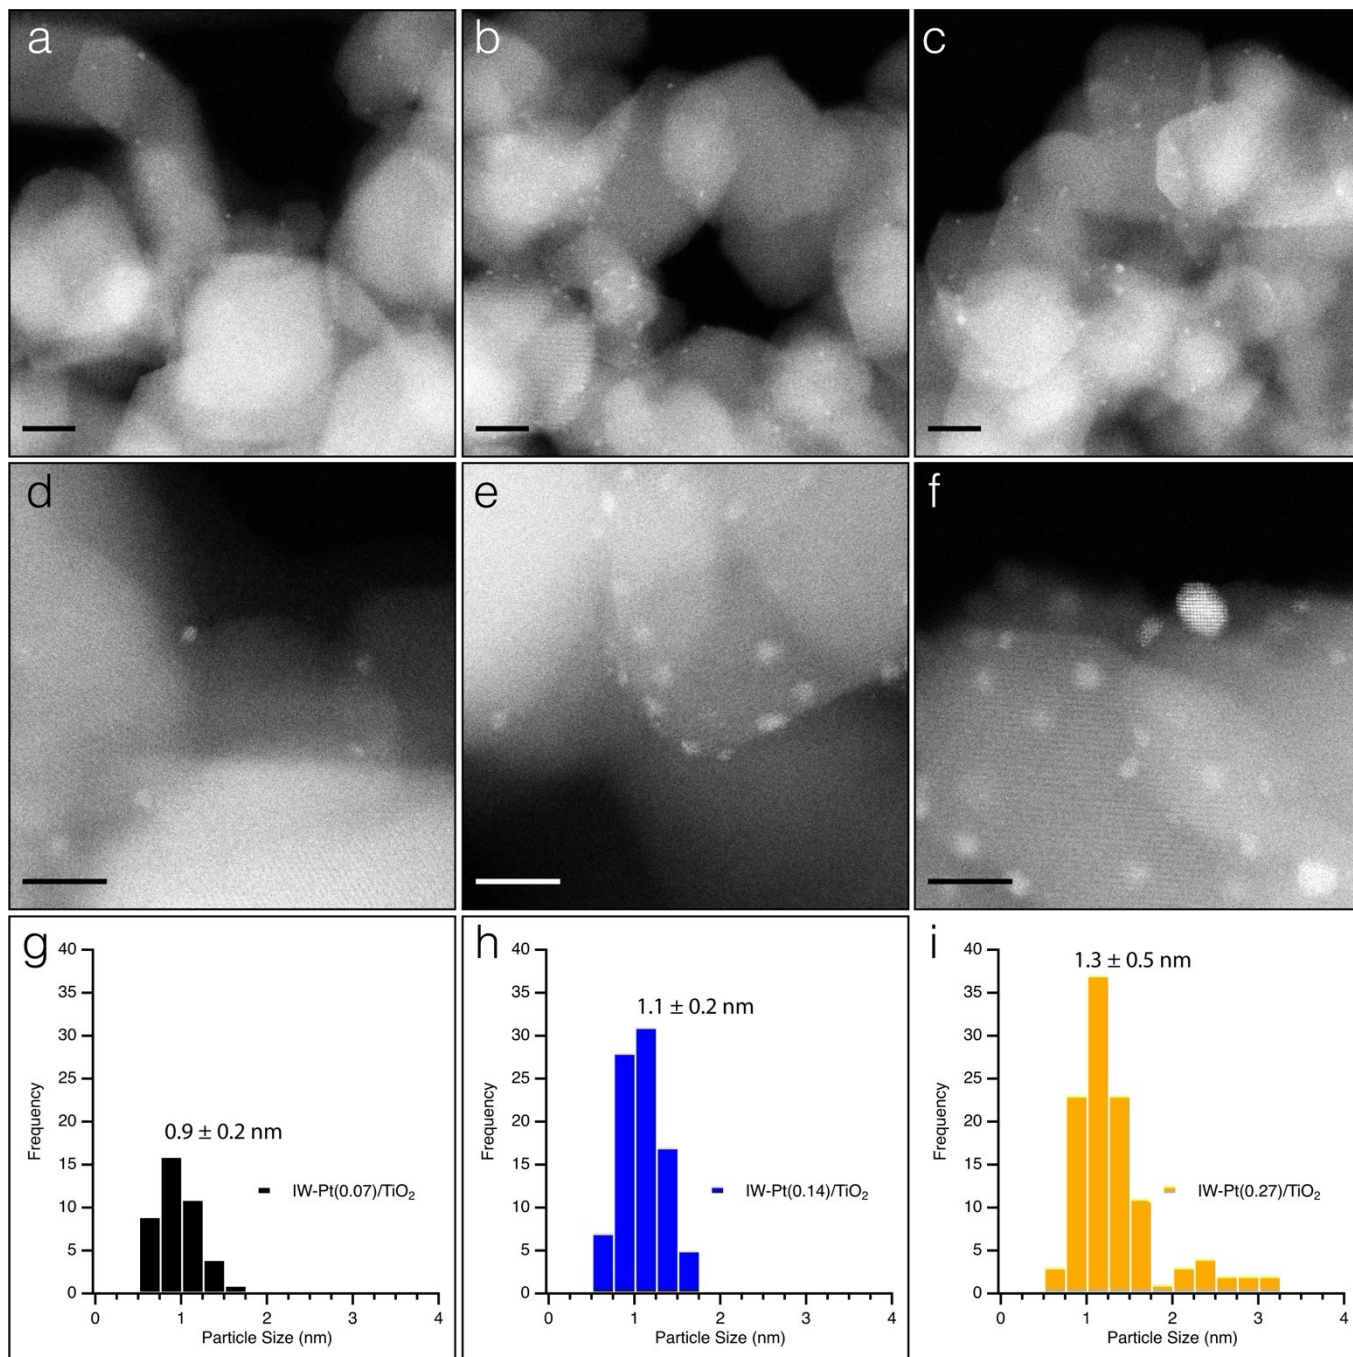

**Figure S6.** Low-magnification HAADF-STEM images of (a) IW-Pt(0.07)/TiO<sub>2</sub>, (b) IW-Pt(0.14)/TiO<sub>2</sub>, and (c) IW-Pt(0.27)/TiO<sub>2</sub> and high-magnification HAADF-STEM images of (d) IW-Pt(0.07)/TiO<sub>2</sub>, (e) IW-Pt(0.14)/TiO<sub>2</sub>, and (f) IW-Pt(0.27)/TiO<sub>2</sub>. Scale bars for a-c are 10 nm and for d-f are 5 nm. Particle size histograms for (g) IW-Pt(0.07)/TiO<sub>2</sub>, (h) IW-Pt(0.14)/TiO<sub>2</sub>, and (i) IW-Pt(0.27)/TiO<sub>2</sub>.

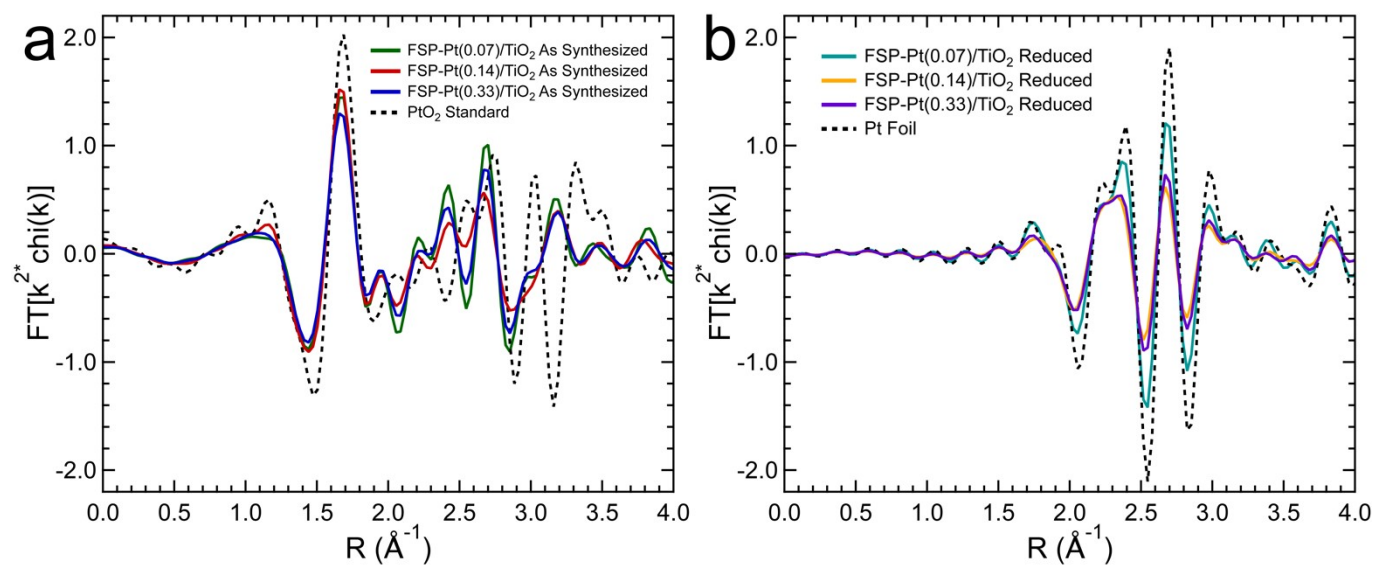

**Figure S7.** Real component of the Fourier transformed  $k^2$ -weighted EXAFS of (a) the as-synthesized and (b) reduced FSP catalysts compared to  $PtO_2$  and Pt foil standards, respectively.

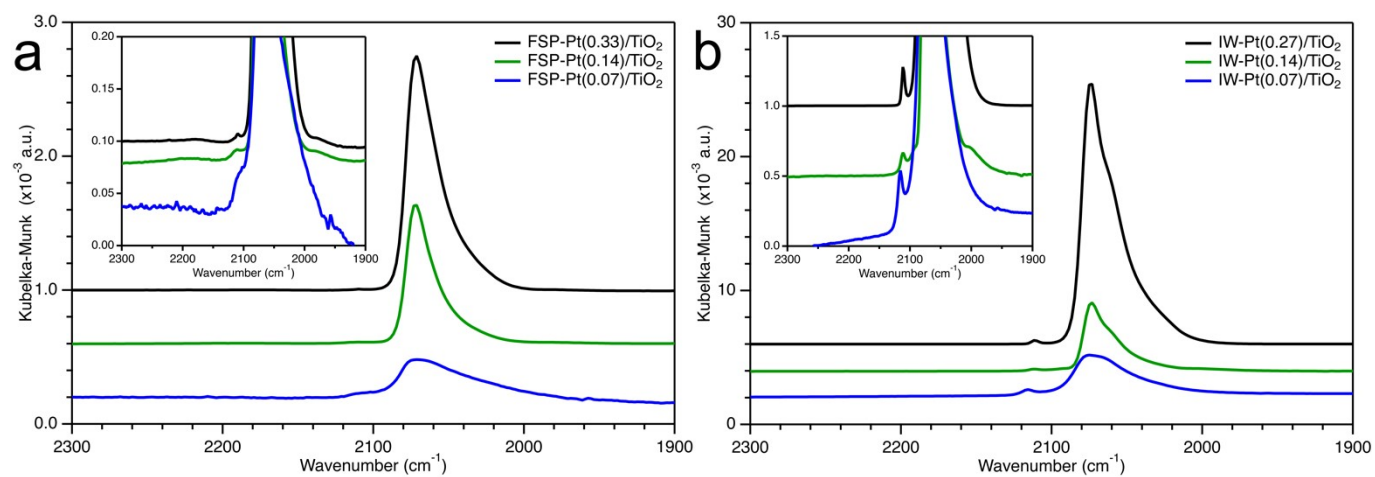

**Figure S8.** DRIFTS spectra of CO adsorbed on (a) FSP-Pt/TiO<sub>2</sub> and (b) IW-Pt/TiO<sub>2</sub> with magnified insets.



**Table S4.** Pt L<sub>III</sub> XANES energies and EXAFS fitting parameters of Pt/TiO<sub>2</sub> catalysts synthesized by flame

| Sample                                          | Edge Energy (eV) | Coordination Number <sup>†</sup> | R (Å)       | $\sigma^2$ (x10 <sup>3</sup> Å <sup>2</sup> ) | E <sub>0</sub> (eV) |
|-------------------------------------------------|------------------|----------------------------------|-------------|-----------------------------------------------|---------------------|
| FSP-Pt(0.07)/TiO <sub>2</sub><br>As-synthesized | 11564.8          | 3.4 ± 0.4 (Pt-O)                 | 1.99 ± 0.02 | 1.7 ± 0.7 ‡                                   | 11.2 ± 2.4          |
| FSP-Pt(0.07)/TiO <sub>2</sub><br>Reduced        | 11562.8          | 9.2 ± 0.5 (Pt-Pt)                | 2.75 ± 0.01 | 5.4 ± 0.2                                     | 7.7 ± 0.4           |
| FSP-Pt(0.14)/TiO <sub>2</sub><br>As-synthesized | 11564.4          | 3.7 ± 0.3 (Pt-O)                 | 1.99 ± 0.01 | 1.7 ± 0.7 ‡                                   | 9.1 ± 1.7           |
| FSP-Pt(0.14)/TiO <sub>2</sub><br>Reduced        | 11562.8          | 7.7 ± 0.6 (Pt-Pt)                | 2.74 ± 0.01 | 7.6 ± 0.4                                     | 7.8 ± 0.6           |
| FSP-Pt(0.33)/TiO <sub>2</sub><br>As-synthesized | 11564.4          | 3.2 ± 0.2 (Pt-O)                 | 1.99 ± 0.01 | 1.7 ± 0.7                                     | 9.1 ± 1.4           |
| FSP-Pt(0.33)/TiO <sub>2</sub><br>Reduced        | 11562.8          | 7.7 ± 0.5 (Pt-Pt)                | 2.75 ± 0.01 | 6.8 ± 0.4                                     | 7.2 ± 0.6           |
| Pt Foil                                         | 11562.76         | 12 (0.86 ± 0.03)                 | 2.76 ± 0.01 | 4.9 ± 0.2                                     | 8.0 ± 0.3           |
| PtO <sub>2</sub>                                | 11565.1          | 6                                | 1.99        | ---                                           | ---                 |

<sup>†</sup> The amplitude reduction factor ( $S_0^2$ ) was determined to be 0.86 from the metal foil. This value was fixed for fits of the samples to determine coordination numbers.

<sup>‡</sup> As-synthesized catalysts were assumed to contained the same species, but in different amounts. Spectra for as-synthesized materials were fit simultaneously using a single  $\sigma^2$  while allowing the coordination numbers, bond lengths, and energy shifts to vary.

spray pyrolysis of as-synthesized samples and after reduction in flowing H<sub>2</sub> at 450 °C.

**Table S5.** Hydrocarbon product categories for whole biomass vapor upgrading and the corresponding compounds for each as utilized in this work.

| Product Categories                   | Representative molecules                                                                                                                                                       |
|--------------------------------------|--------------------------------------------------------------------------------------------------------------------------------------------------------------------------------|
| <b>Alkanes</b>                       | Cycloalkanes (C6-C9), isoalkanes (C5-C8), n-alkanes (C2-C10)                                                                                                                   |
| <b>Alkene</b>                        | Cycloalkenes (C6-C9), isoalkenes (C5-C8), n-alkenes (C2-C10)                                                                                                                   |
| <b>Aromatics</b>                     | 1-ring aromatics (benzene, toluene, xylene, ethylbenzene, propylbenzene, methylbenzene), 2-ring aromatics (biphenyl, indane, indene, naphthalene, tetralins), 3-ring aromatics |
| <b>Partially upgraded Oxygenates</b> | 2-butanone, acetone, cyclopentanones, other ketones, phenols, furan                                                                                                            |
| <b>Primary oxygenates</b>            | Furanones, methoxyphenols, acetaldehyde, other aldehydes, acids                                                                                                                |
| <b>Unknown</b>                       | -                                                                                                                                                                              |

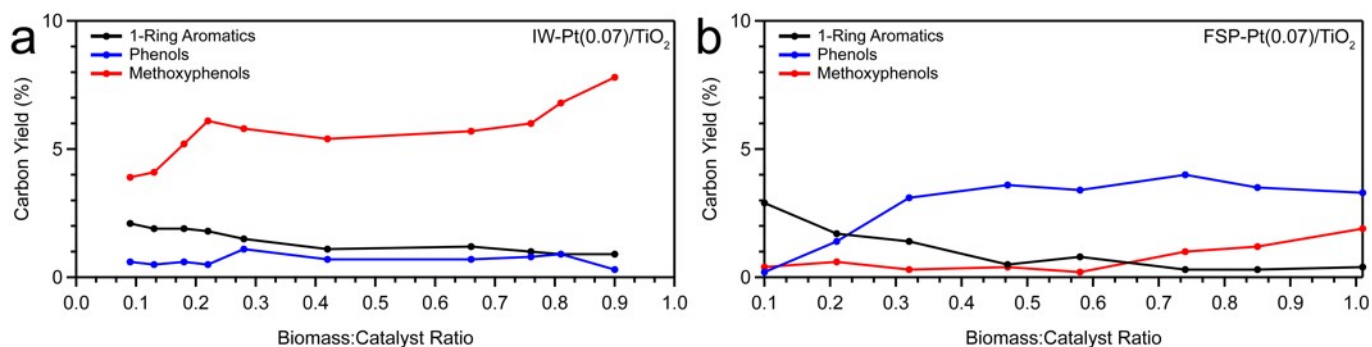

**Figure S9.** Carbon yield to 1-ring aromatics, phenols, and methoxyphenols as a function of biomass:catalyst ratio for (a) IW-Pt(0.07)/TiO<sub>2</sub> and (b) FSP-Pt(0.07)/TiO<sub>2</sub> catalysts.

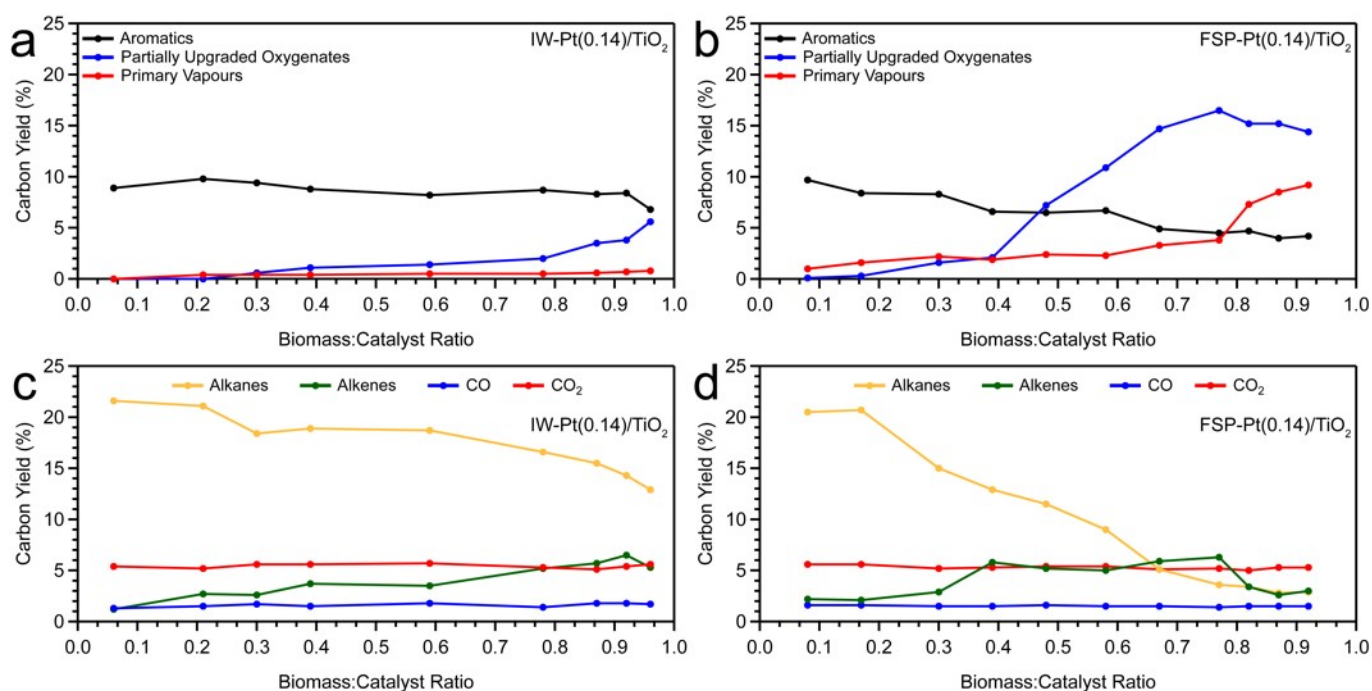

**Figure S10.** Carbon yield to aromatics, partially upgraded oxygenates, and primary vapours as a function of biomass:catalyst ratio for (a) IW-Pt(0.14)/TiO<sub>2</sub> and (b) FSP-Pt(0.14)/TiO<sub>2</sub> catalysts and carbon yield to alkenes, alkanes, CO, and CO<sub>2</sub>, as a function of biomass:catalyst ratio for (c) IW-Pt(0.14)/TiO<sub>2</sub> and (d) FSP-Pt(0.14)/TiO<sub>2</sub> catalysts.

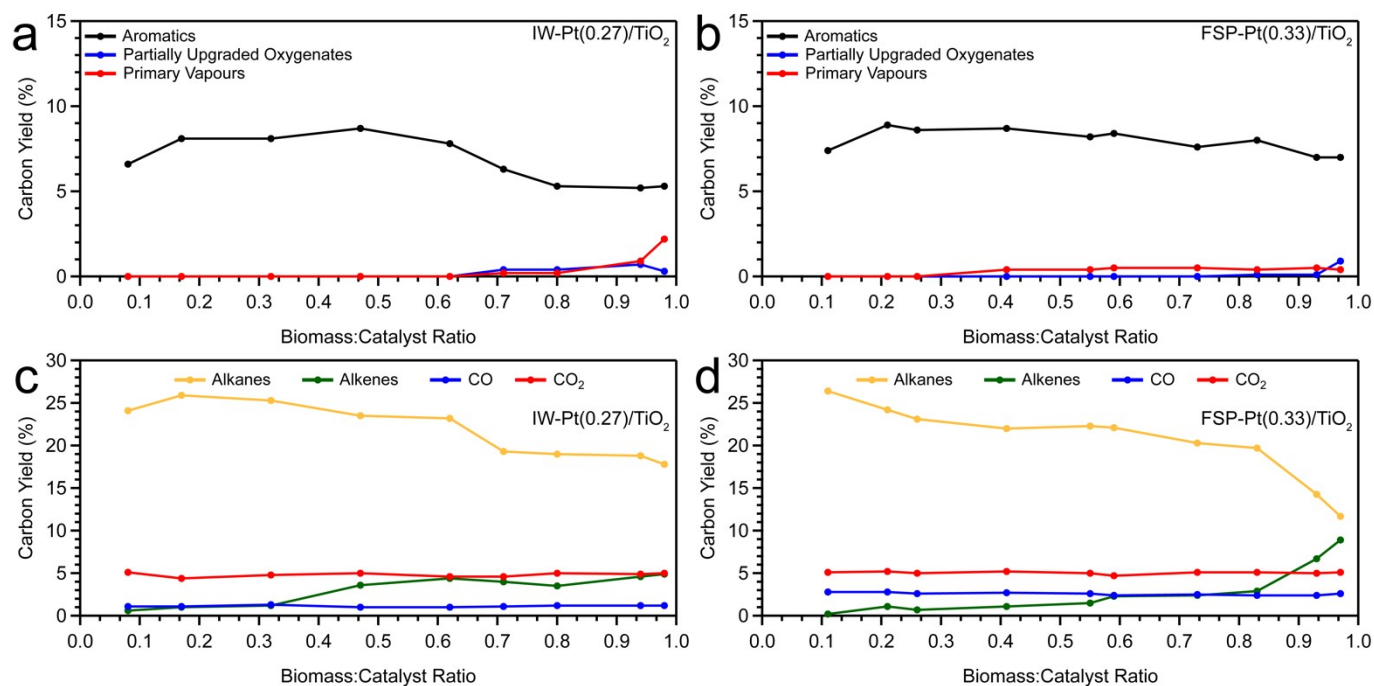

**Figure S11.** Carbon yield to aromatics, partially upgraded oxygenates, and primary vapours as a function of biomass:catalyst ratio for (a) IW-Pt(0.27)/TiO<sub>2</sub> and (b) FSP-Pt(0.33)/TiO<sub>2</sub> catalysts and carbon yield to alkenes, alkanes, CO, and CO<sub>2</sub>, as a function of biomass:catalyst ratio for (c) IW-Pt(0.27)/TiO<sub>2</sub> and (d) FSP-Pt(0.33)/TiO<sub>2</sub> catalysts.
